# Retraction: MicroRNA-542-3p inhibits oral squamous cell carcinoma progression by inhibiting ILK/TGF- $\beta$ 1/Smad2/3 signaling

Bin Qiao<sup>1,\*</sup>, Jing-Hua Cai<sup>1,\*</sup>, Alfred King-Yin Lam<sup>1,2</sup> and Bao-Xia He<sup>3</sup>

<sup>1</sup>Department of Stomatology, The First Affiliated Hospital of Zhengzhou University, Zhengzhou 450052, P.R. China

<sup>2</sup>Cancer Molecular Pathology, School of Medicine and Menzies Health Institute Queensland, Griffith University, Gold Coast 4222, Australia

<sup>3</sup>Department of Pharmacy, Affiliated Cancer Hospital of Zhengzhou University/Henan Cancer Hospital, Zhengzhou 450003, P.R. China

\*These authors shared the co-first author

**Published:** December 31, 2025

**Copyright:** © 2025 Qiao et al. This is an open access article distributed under the terms of the [Creative Commons Attribution License](#) (CC BY 4.0), which permits unrestricted use, distribution, and reproduction in any medium, provided the original author and source are credited.

**This article has been retracted:** An Oncotarget Image Forensics investigation has discovered instances of internal and external image overlaps and duplications. The GAPDH bands in Figure 1B also appeared as b-actin blot in Figure 6B. This b-actin blot was found in the papers published concurrently in Figure 3A of [1], Figure 4B of [2] and in Figure 2C of [3]. This blot also appeared as GAPDH blot in papers [4–6]. All these papers have been retracted since. The TGF- $\beta$ 1 blot in Figure 1B was found as Ngfap1 blot in later published paper [7]. Figure 9A, representing transwell assay data, contains internal overlaps as well as overlaps with images in later published papers [8–10]. Additionally, we found duplicated tumor images in Figure 11B, some of which also appeared in already retracted papers [11, 12]. The authors were notified of the problems and the corresponding author Dr. Bin Qiao has claimed the images are original and that they are the victim of image leaking, but they have not provided suitable documentation to demonstrate originality or an adequate explanation of how the alleged leaking occurred. Given the number and timing of these duplications, the Editors have determined that the integrity of the published work is compromised. Therefore, the decision has been made to retract this paper.

Original article: Oncotarget. 2017; 8:70761–70776. <https://doi.org/10.18632/oncotarget.19986>

## REFERENCES

1. Shen M, Wang S, Wen X, Han XR, Wang YJ, Zhou XM, Zhang MH, Wu DM, Lu J, Zheng YL. RETRACTED: Dexmedetomidine exerts neuroprotective effect via the activation of the PI3K/Akt/mTOR signaling pathway in rats with traumatic brain injury. *Biomed Pharmacother.* 2017; 95:885–93. <https://doi.org/10.1016/j.biopha.2017.08.125>. [PubMed]. Retraction in: *Biomed Pharmacother.* 2023; 169:115945. <https://doi.org/10.1016/j.biopha.2023.115945>. [PubMed]
2. Wang YJ, Zhang ZF, Fan SH, Zhuang J, Shan Q, Han XR, Wen X, Li MQ, Hu B, Sun CH, Qiao B, Tao Q, Wu DM, et al. MicroRNA-433 inhibits oral squamous cell carcinoma cells by targeting FAK. *Oncotarget.* 2017; 8:100227–41. <https://doi.org/10.18632/oncotarget.22151>. [PubMed]. Retraction in: *Oncotarget.* 2022; 13:1033. <https://doi.org/10.18632/oncotarget.28270>. [PubMed]
3. Wen X, Han XR, Wang YJ, Fan SH, Zhuang J, Zhang ZF, Shan Q, Li MQ, Hu B, Sun CH, Wu Q, Tan JH, Wu DM, et al. Effects of long noncoding RNA SPRY4-IT1-mediated EZH2 on the invasion and migration of lung adenocarcinoma. *J Cell Biochem.* 2018; 119:1827–40. <https://doi.org/10.1002/jcb.26344>. [PubMed]. Retraction in: *J Cell Biochem.* 2021 (Suppl 1); 122:S68. <https://doi.org/10.1002/jcb.30036>. [PubMed]
4. Li XJ, Li ZF, Wang JJ, Han Z, Liu Z, Liu BG. Effects of microRNA-374 on proliferation, migration, invasion, and apoptosis of human SCC cells by targeting Gadd45a through P53 signaling pathway. *Biosci Rep.* 2017; 37:BSR20170710. <https://doi.org/10.1042/BSR20170710>. [PubMed]. Retraction in: *Biosci Rep.* 2021; 41:BSR-20170710\_RET. [https://doi.org/10.1042/BSR-20170710\\_RET](https://doi.org/10.1042/BSR-20170710_RET). [PubMed]

5. Zhu XB, Lin WJ, Lv C, Wang L, Huang ZX, Yang SW, Chen X. MicroRNA-539 promotes osteoblast proliferation and differentiation and osteoclast apoptosis through the AXNA-dependent Wnt signaling pathway in osteoporotic rats. *J Cell Biochem.* 2018; 119:8346–58. <https://doi.org/10.1002/jcb.26910>. [PubMed]. Retraction in: *J Cell Biochem.* 2021 (Suppl 1); 122:S96. <https://doi.org/10.1002/jcb.30064>. [PubMed]
6. Sun LQ, Guo GL, Zhang S, Yang LL. Effects of MicroRNA-592-5p on Hippocampal Neuron Injury Following Hypoxic-Ischemic Brain Damage in Neonatal Mice - Involvement of PGD2/DP and PTGDR. *Cell Physiol Biochem.* 2018; 45:458–73. <https://doi.org/10.1159/000486923>. [PubMed]. Retraction in: *Cell Physiol Biochem.* 2020; 55:520. <https://doi.org/10.33594/000000412>. [PubMed]
7. Wen Y, Liu G, Jia L, Ji W, Li H. MicroRNA-141 binds to the nerve growth factor receptor associated protein 1 gene and restores the erectile function of diabetic rats through down-regulating the nerve growth factor/neurotrophin receptor p75 (NGF/p75NTR) signaling. *J Cell Biochem.* 2019; 120:7940–51. <https://doi.org/10.1002/jcb.28071>. [PubMed]
8. Pan BL, Tong ZW, Wu L, Pan L, Li JE, Huang YG, Li SD, Du SX, Li XD. Effects of MicroRNA-206 on Osteosarcoma Cell Proliferation, Apoptosis, Migration and Invasion by Targeting ANXA2 Through the AKT Signaling Pathway. *Cell Physiol Biochem.* 2018; 45:1410–22. <https://doi.org/10.1159/000487567>. [PubMed]. Retraction in: *Cell Physiol Biochem.* 2020; 54:805. <https://doi.org/10.33594/000000267>. [PubMed]
9. Zhang XL, Xu FX, Han XY. siRNA-mediated NCAM1 gene silencing suppresses oxidative stress in pre-eclampsia by inhibiting the p38MAPK signaling pathway. *J Cell Biochem.* 2019; 120:18608–17. <https://doi.org/10.1002/jcb.28778>. [PubMed]
10. Xia P, Gao X, Shao L, Chen Q, Li F, Wu C, Zhang W, Sun Y. Down-regulation of RAC2 by small interfering RNA restrains the progression of osteosarcoma by suppressing the Wnt signaling pathway. *Int J Biol Macromol.* 2019; 137:1221–31. <https://doi.org/10.1016/j.ijbiomac.2019.07.016>. [PubMed]
11. Zhang ZF, Wang YJ, Fan SH, Du SX, Li XD, Wu DM, Lu J, Zheng YL. MicroRNA-182 downregulates Wnt/ $\beta$ -catenin signaling, inhibits proliferation, and promotes apoptosis in human osteosarcoma cells by targeting HOXA9. *Oncotarget.* 2017; 8:101345–61. <https://doi.org/10.18632/oncotarget.21167>. [PubMed]. Retraction in: *Oncotarget.* 2022; 13:1003. <https://doi.org/10.18632/oncotarget.28269>. [PubMed]
12. Lu HJ, Yan J, Jin PY, Zheng GH, Zhang HL, Bai M, Wu DM, Lu J, Zheng YL. Mechanism of MicroRNA-708 Targeting BAMBI in Cell Proliferation, Migration, and Apoptosis in Mice With Melanoma via the Wnt and TGF- $\beta$  Signaling Pathways. *Technol Cancer Res Treat.* 2018; 17:1533034618756784. <https://doi.org/10.1177/1533034618756784>. [PubMed]. Retraction in: *Technol Cancer Res Treat.* 2022; 21:15330338221126060. <https://doi.org/10.1177/15330338221126060>. [PubMed]
